## In this issue

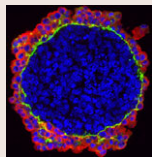**Early steps for integrins**

It has been known for more than a decade that  $\alpha\beta 1$  integrins are essential for the formation of primitive germ layers from the inner cell mass (ICM), but how these integrins regulate ICM morphogenesis has been more difficult to decipher. Here, Shaohua Li, Reinhard Fässler and colleagues (p. 233) use the mouse embryonic-stem-cell-derived embryoid body (EB) to dissect the early stages of morphogenesis. By ablating  $\beta 1$  integrin in EBs, they show that  $\alpha\beta 1$  integrins are essential for the adhesion of endoderm cells to the basement membrane. Moreover, endoderm differentiation can be divided into two steps – lineage commitment and maturation – and  $\beta 1$  integrins are only required for maturation. In the absence of  $\beta 1$  integrins, the endoderm-specific transcription factor GATA4, which regulates laminin synthesis, is expressed, but does not translocate to the nucleus. Interestingly,  $\beta 3$  integrin can substitute for  $\beta 1$  integrin in the endoderm and, when transfected, causes correct localization of GATA4 to the nucleus and expression of laminin. Finally, the authors show that the mitogen-activated protein kinases ERK1/2 and p38 mediate integrin-dependent GATA4 nuclear translocation and endoderm maturation. These findings provide new mechanistic insights into how  $\beta 1$ -mediated signalling regulates the differentiation of the visceral endoderm.

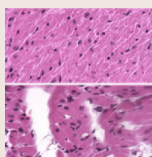**Keeping (TGF $\beta$ ) active with integrins**

Before its activation, the multipotent cytokine TGF $\beta$  is secreted from the cell in a latent complex with its inhibitory peptide LAP. Two integrin heterodimers,  $\alpha\beta 6$  and  $\alpha\beta 8$ , activate the TGF $\beta$  isoforms TGF $\beta 1$  and TGF $\beta 3$  in vivo, dislodging LAP by interacting with an Arg-Gly-Asp (RGD) sequence on the latent complex. Six other integrin heterodimers are also known to bind to RGD sequences – but do they activate TGF $\beta 1$  and TGF $\beta 3$ ? To address this question, John Munger and colleagues (p. 227) explore the phenotype of mice that lack functional  $\beta 6$ - and  $\beta 8$ -integrins. The authors first show that double-knockout (*Itgb6*<sup>-/-</sup>/*Itgb8*<sup>-/-</sup>) mice mostly die at mid-gestation. Notably, however, those that survive develop cleft palates – as do *Tgfb3*<sup>-/-</sup> mice. To study the role of integrins  $\alpha\beta 6$  and  $\alpha\beta 8$  at later developmental stages, the authors next treat *Itgb8*<sup>-/-</sup> mice with an anti- $\alpha\beta 6$ -integrin antibody after palate fusion. These mice develop severe systemic autoimmunity (indicated by mononuclear infiltrates in several organs) and also lack Langerhans cells, echoing the phenotype of mice that lack integrin-responsive TGF $\beta 1$ . The authors propose, therefore, that the activity of integrins  $\alpha\beta 6$  and  $\alpha\beta 8$  (but not of other RGD-binding integrins) is required for the developmental effects of TGF $\beta 1$  and TGF $\beta 3$ . Their data clarify the role of integrin-mediated TGF $\beta$  activation in vivo.

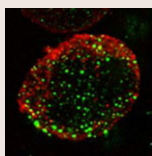**JAM-A – getting neutrophils unstuck**

Early in the inflammatory response, neutrophils infiltrate tissues by migrating (extravasating) across the endothelium of blood vessels, then moving chemotactically towards the site of inflammation. The expression of the cell-surface adhesion protein JAM-A in endothelial cells is thought to affect neutrophil extravasation – but does JAM-A expressed in neutrophils also function in infiltration? On page 268, Elisabetta Dejana and colleagues show that it does. The authors have previously demonstrated that, in vitro, JAM-A expression in neutrophils is needed for their efficient directional migration; now, they show that the migration of leukocytes after extravasation is impaired in JAM-A-deficient mice. In activated HL60 neutrophils, they show, JAM-A is internalised into intracellular vesicles that also contain several integrins. Moreover, cell-surface JAM-A co-clusters with  $\beta 1$  integrin in the presence of fibronectin-coated beads or anti-integrin antibodies. Importantly, the internalisation of integrins by neutrophils derived from JAM-A-deficient mice in response to chemotactic signals is impaired, affecting both uropod retraction and cell motility. On the basis of these and other data, the authors propose that JAM-A promotes neutrophil chemotaxis by controlling integrin internalisation and recycling.

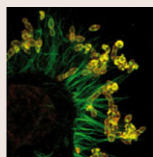**Pneumococci take the integrin route**

To promote its invasion into host cells, the Gram-positive bacterium *Streptococcus pneumoniae* (pneumococcus) interacts specifically with several host proteins, including cell-surface receptors and ECM components. For instance, pneumococci are known to bind to the ECM- and plasma-localised protein vitronectin, and Sven Hammerschmidt and colleagues (p. 256) now shed light on how this interaction affects pneumococcal uptake and host-cell signalling cascades. Using flow cytometry, the authors first show that pneumococci interact with the heparin-binding sites of multimeric (ECM-associated) vitronectin. Moreover, cell-associated multimeric vitronectin promotes pneumococcal adhesion to, and invasion of, human epithelial and endothelial cells. Notably, the authors show that  $\alpha\beta 3$  integrin is required for vitronectin-dependent invasion – as is integrin-linked kinase (ILK), which is known to mediate several downstream effects of integrin activation (including actin-cytoskeleton reorganisation). In line with this observation, internalisation of pneumococci requires a dynamic actin cytoskeleton, and their interaction with the host cell causes the formation of microspike-like structures (see image) that are the sites of pneumococcal entrapment. The authors conclude that pneumococci exploit the dynamic processes of the host cell to enable invasion.

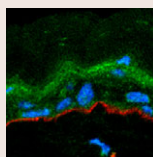**Integrin  $\alpha\beta 1$  runs interference**

Wound healing in the skin requires migration and hyperproliferation of keratinocytes. Integrin  $\alpha\beta 1$ , among other members of the integrin family, mediates the attachment of basal epidermal keratinocytes to the basement membrane, so its role in adult skin and wound healing is of interest. Complicating such studies, however, are  $\alpha 3$ -integrin-null mice, which die during the neonatal period. Controversially, integrin  $\alpha\beta 1$  has also been independently reported to promote and inhibit keratinocyte migration in vitro. Arnoud Sonnenberg and colleagues (p. 278) now generate epidermis-specific  $\alpha 3$ -integrin-knockout mice to investigate the function of integrin  $\alpha\beta 1$  in wound re-epithelialisation. These mice are viable, but display local inflammation, hair loss, basement-membrane duplication and microblistering at the dermal-epidermal junction; hemidesmosome assembly and keratinocyte differentiation are not impaired. In the absence of integrin  $\alpha\beta 1$  there is no change in keratinocyte proliferation, the distribution of other integrins and the deposition of basement-membrane proteins in the wound bed, but wound healing is faster, suggesting accelerated keratinocyte migration. Supporting in vitro evidence shows that  $\alpha 3$ -integrin-deficient keratinocytes migrate with increased velocity and persistence. The authors' results support a role for  $\alpha\beta 1$  integrin in inhibiting the directional migration of keratinocytes in vitro and wound re-epithelialisation in vivo.

**Development in press****Cells cycle with no poles**

In *Drosophila*, the nuclear divisions following fertilisation oscillate rapidly between S and M phases, with no growth phases or cytoplasmic cleavage. Metazoan development depends on correct cell-cycle control, but it remains unknown how DNA replication and mitosis are coordinated during such rapid divisions. In a paper published in *Development*, Laura Lee and co-workers reveal that *no poles* (*nopo*), a gene encoding a putative ubiquitin ligase, is essential for the preservation of genomic integrity during these early stages of *Drosophila* development. The researchers find that *nopo*-mutant flies have misshapen spindles and undergo mitotic arrest, and that a mutation in the gene encoding the DNA-checkpoint kinase *Chk2* partially rescues these defects. Thus, the *nopo* phenotype is probably caused by Chk2-mediated centrosome inactivation, a protective mechanism in flies that prevents nuclear division after DNA damage or incomplete replication. In addition, the authors demonstrate that NOPO interacts with BEN, a ubiquitin-conjugating enzyme, leading them to propose that NOPO and BEN form a ubiquitin ligase complex required to prevent DNA defects during *Drosophila* embryogenesis.

Merkle, J. A., Rickmyre, J. L., Garg, A., Loggins, E. B., Jodoin, J. N., Lee, E., Wu, L. P. and Lee, L. A. (2009). *no poles* encodes a predicted E3 ubiquitin ligase required for early embryonic development of *Drosophila*. *Development* **136**, 449–459.
